# Supplementary material for: Effect of axial length and age on the visual outcome of patients with idiopathic epiretinal membrane after pars plana vitrectomy
Source: PubMed Central journal article supplement (PMC6911110; doi:10.1038/s41598-019-55544-6), 2019-12-13
Supplement: 41598_2019_55544_MOESM1_ESM.pdf [file 41598_2019_55544_MOESM1_ESM.pdf]

## **Effect of axial length and age on the visual outcome of patients with idiopathic epiretinal membrane after pars plana vitrectomy**

Sakiko Minami<sup>1a,2,3</sup>, Hajime Shinoda<sup>1a</sup>, Yuta Shigeno<sup>1a</sup>, Norihiro Nagai<sup>1ab</sup>, Toshihide Kurihara<sup>1a</sup>, Kazuhiro Watanabe<sup>1a</sup>, Hideki Sonobe<sup>1a</sup>, Hitoshi Takagi<sup>3</sup>, Kazuo Tsubota<sup>1a</sup>, Yoko Ozawa<sup>\*1ab</sup>

1a Department of Ophthalmology, Keio University, School of Medicine; 1b Laboratory of Retinal Cell, Biology Department of Ophthalmology, Keio University, School of Medicine; 2 Inagi Municipal Hospital; 3 Department of Ophthalmology, St. Marianna University School of Medicine.

### **\*Corresponding author:**

**Yoko Ozawa, M.D., Ph.D.**

Laboratory of Retinal Cell Biology

Department of Ophthalmology

Keio University School of Medicine

35 Shinanomachi, Shinjuku-ku, Tokyo 160-8582, Japan

Phone: +81-3-5363-3869, Fax: +81-3-5363-3869

E-mail: [ozawa@a5.keio.jp](mailto:ozawa@a5.keio.jp)

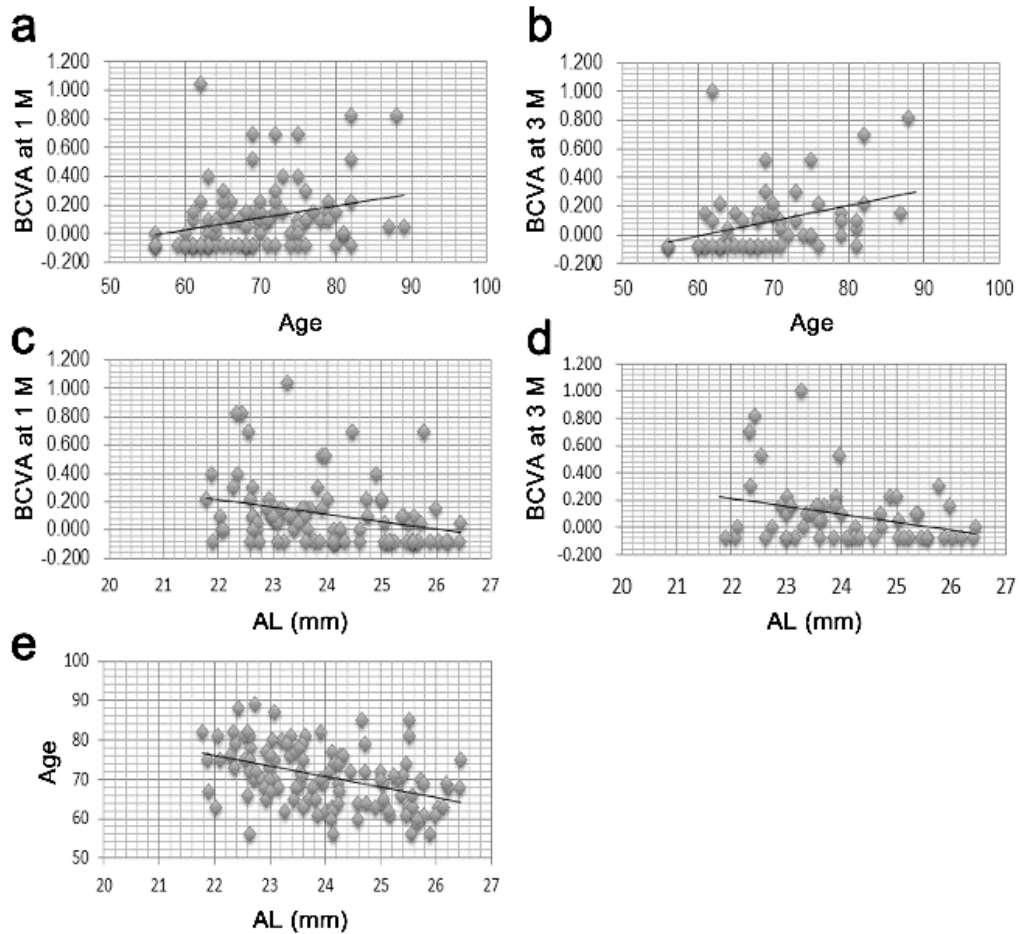

## Supplementary Figure 1

### Supplementary Figure 1

#### Scatter plots between best-corrected visual acuity (BCVA), age and axial length (AL)

Pearson correlation coefficient. There were correlations between age and BCVA at 1 month (a,  $r=0.276$ ,  $P=0.007$ ), age and BCVA at 3 months (b,  $r=0.353$ ,  $P=0.007$ ), AL and BCVA at 1 month (c,  $r=-0.289$ ,  $P=0.005$ ), AL and BCVA at 3 months (d,  $r=-0.311$ ,  $P=0.018$ ), and age and AL (e,  $r=-0.428$ ,  $P<0.001$ ). BCVA, best-corrected visual acuity; AL, axial length.

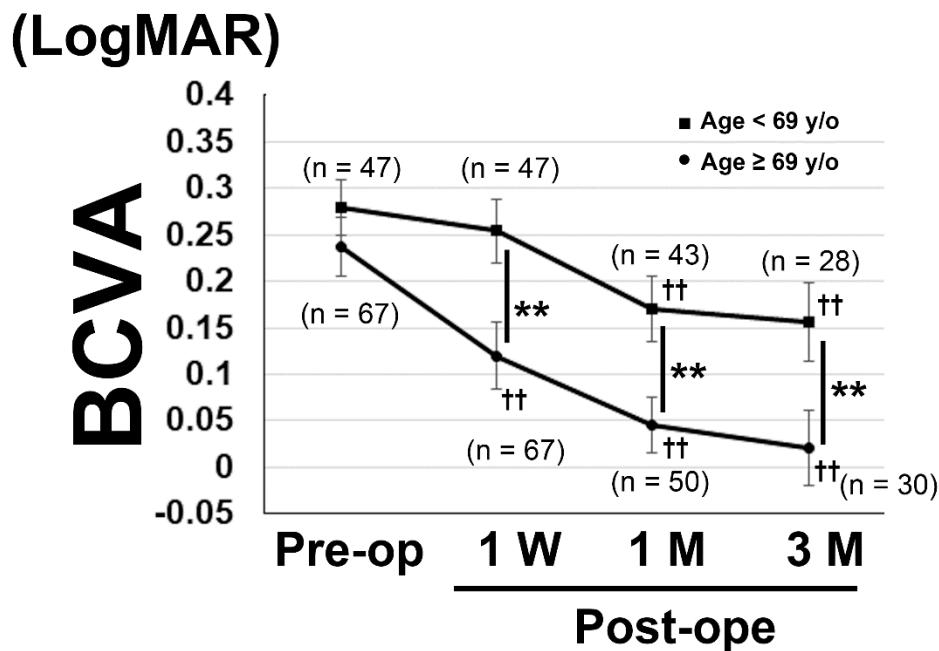

## Supplementary Figure 2

### Supplementary Figure 2.

#### Mean best-corrected visual acuity (BCVA) in the patients with age < and ≥ 69 years old

Mann-Whitney U test was performed for comparing mean BCVA at each time point between the groups. In patients with age ≥ 69, the mean BCVAs were significantly worse at 1 week and 1- and 3-months postoperatively. Generalized mixed model analysis was performed for comparing the preoperative data with the 1-week and 1- and 3-month postoperative data. BCVA improved at 1 week after surgery in patients aged < 69 years old, while it was better than the preoperative value at 1 and 3 months after surgery in both groups. Data are shown as mean ± standard error. \*\*P < 0.01 for comparisons between the groups. ††P < 0.01 for comparisons between preoperative and postoperative values at each time point.
